# Supplementary material for: A high-performance supercapacitor cell based on ZIF-8-derived nanoporous carbon using an organic electrolyte
Source: Royal Society of Chemistry journal article supplement (doi:10.1039/c6cc00413j), 2016-01-01
Supplement: c6cc00413j1.pdf [file c6cc00413j1.pdf]

## Experimental

**Chemicals.** 2-Methylimidazole (MIM, purity 99%), zinc acetate dihydrate ( $\text{Zn}(\text{CH}_3\text{COO})_2\cdot 2\text{H}_2\text{O}$ , purity 97%), and anhydrous propylene carbonate (PC) were purchased from Sigma-Aldrich Chemical Co. Polyvinylpyrrolidone (PVP, K30), hydrochloric acid solution, tetraethylammonium tetrafluoroborate ( $\text{NEt}_4\text{BF}_4$ ), and methanol were obtained from Nacalai Tesque Reagent Co. All chemicals were used without further purification or treatment.

**Material characterizations.** The SEM and TEM images were taken on Hitachi S-4800 and JEOL JEM-2100F, 200 kV systems, respectively. A Rigaku 2500 system equipped with Cu  $K\alpha$  radiation ( $\lambda = 0.15406$  nm) was used to study the crystalline structures of the powder samples. The details of different bondings present on the material surfaces have been characterized using a micro Raman (Horiba-Jovin Yvon T65000) analysis station. The nitrogen adsorption–desorption isotherms were collected on a quantachrome autosorb automated gas sorption system at 77 K.

**Details of device fabrication.** Electrochemical measurements were carried out using a CHI 660e (CH Instruments) electrochemical workstation. For electrochemical measurements of supercapacitor cell, a pair of NPC films was sandwiched in an HS test cell (Hohsen Corp.) configuration. The weight of each electrode was kept at 2 mg. A 2-M tetraethylammonium tetrafluoroborate ( $\text{NEt}_4\text{BF}_4$ ) in anhydrous propylene carbonate (PC) was used as an electrolyte. The separator used was a Wattman glass microfiber filter paper soaked with the electrolyte. The electrochemical cell was fabricated in a glove box, and then tightly packed device measurements were carried out in an air atmosphere. The cyclic voltammetry data were collected in the potential window of 0.0 to 2.4 V with a scan speed variation from 10 to 500  $\text{mV}\cdot\text{s}^{-1}$ . The charge–discharge studies with the extension of potential window studied at various potential windows from 1.4 to 2.4 V. The electrochemical impedance spectroscopy analysis was carried out within a frequency range from 1 mHz to  $10^5$  Hz at a potential equal to the open circuit potential.

**Table S1** Summary of surface area and pore volume obtained from N<sub>2</sub> adsorption isotherms.

| Sample | S <sub>BET</sub><br>(m <sup>2</sup> ·g <sup>-1</sup> ) | S <sub>micro</sub><br>(m <sup>2</sup> ·g <sup>-1</sup> ) | S <sub>micro</sub> /S <sub>BET</sub><br>(%) | V <sub>pore</sub><br>(cm <sup>3</sup> ·g <sup>-1</sup> ) | V <sub>micro</sub><br>(cm <sup>3</sup> ·g <sup>-1</sup> ) | V <sub>micro</sub> /V <sub>pore</sub><br>(%) |
|--------|--------------------------------------------------------|----------------------------------------------------------|---------------------------------------------|----------------------------------------------------------|-----------------------------------------------------------|----------------------------------------------|
| NPC    | 1873                                                   | 876                                                      | 46.8                                        | 1.17                                                     | 0.48                                                      | 41.0                                         |
| AC     | 1734                                                   | 753                                                      | 43.4                                        | 0.99                                                     | 0.44                                                      | 44.4                                         |

**Figure S1**

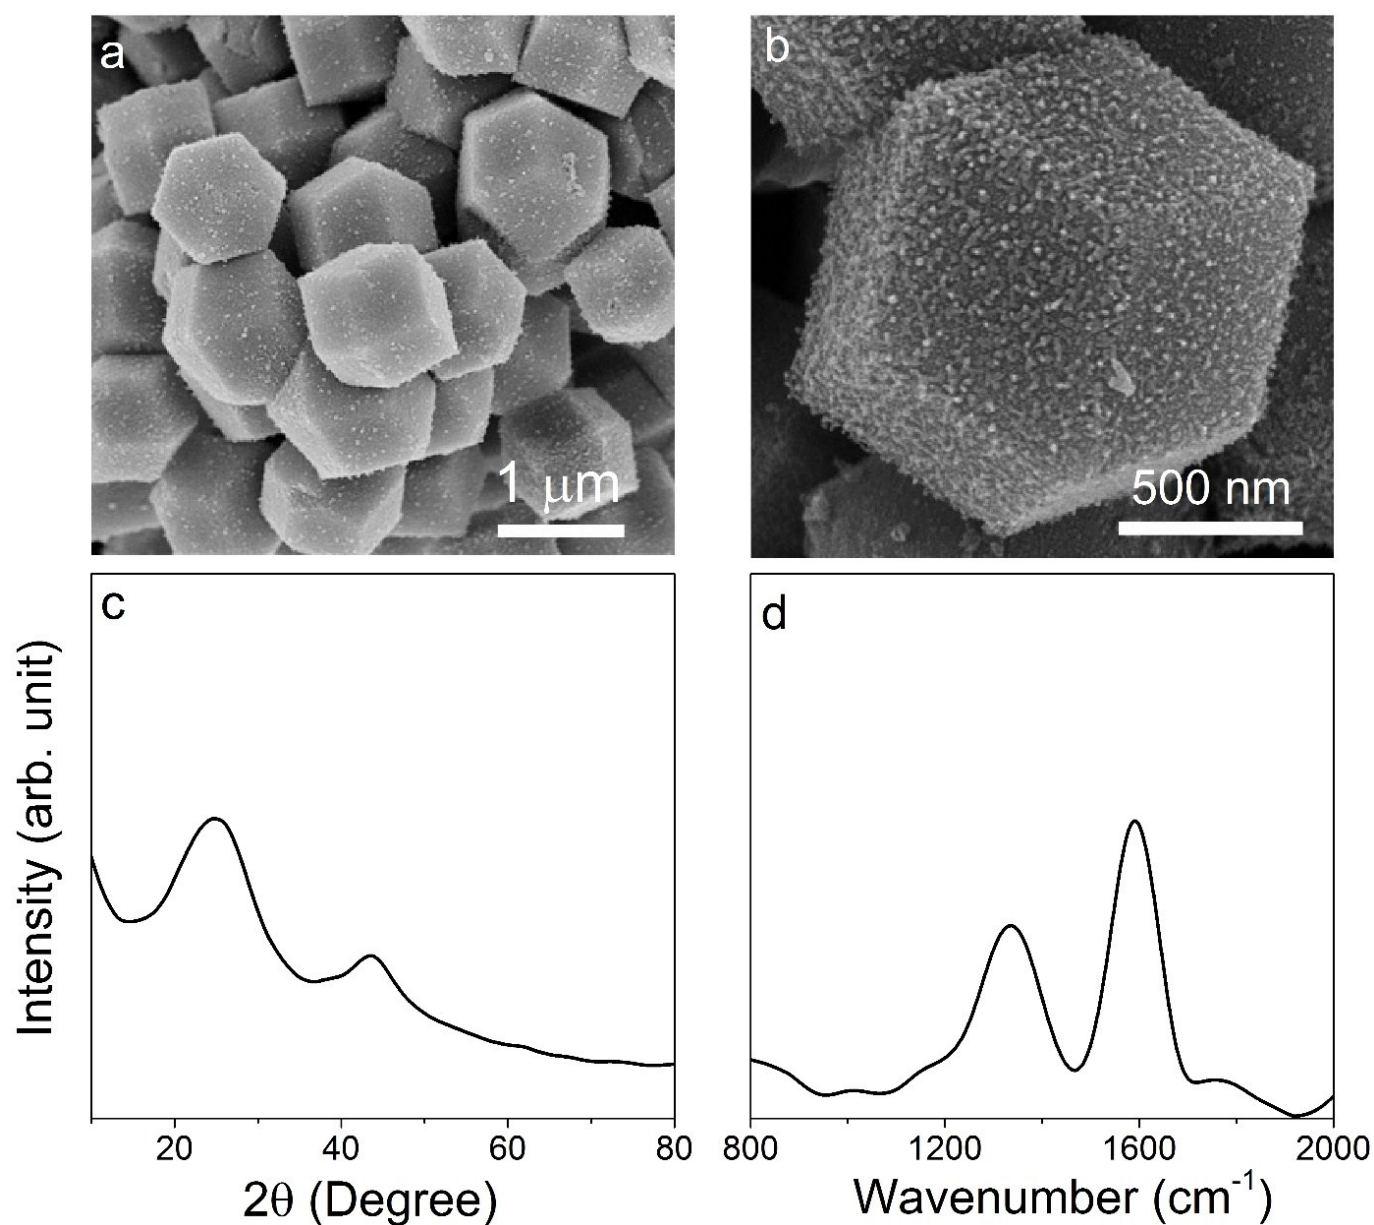

**Figure S1** (a) Low- and (b) high-magnification SEM images, (c) wide-angle XRD pattern, and (d) Raman spectra for MOF-derived NPC.

**Figure S2**

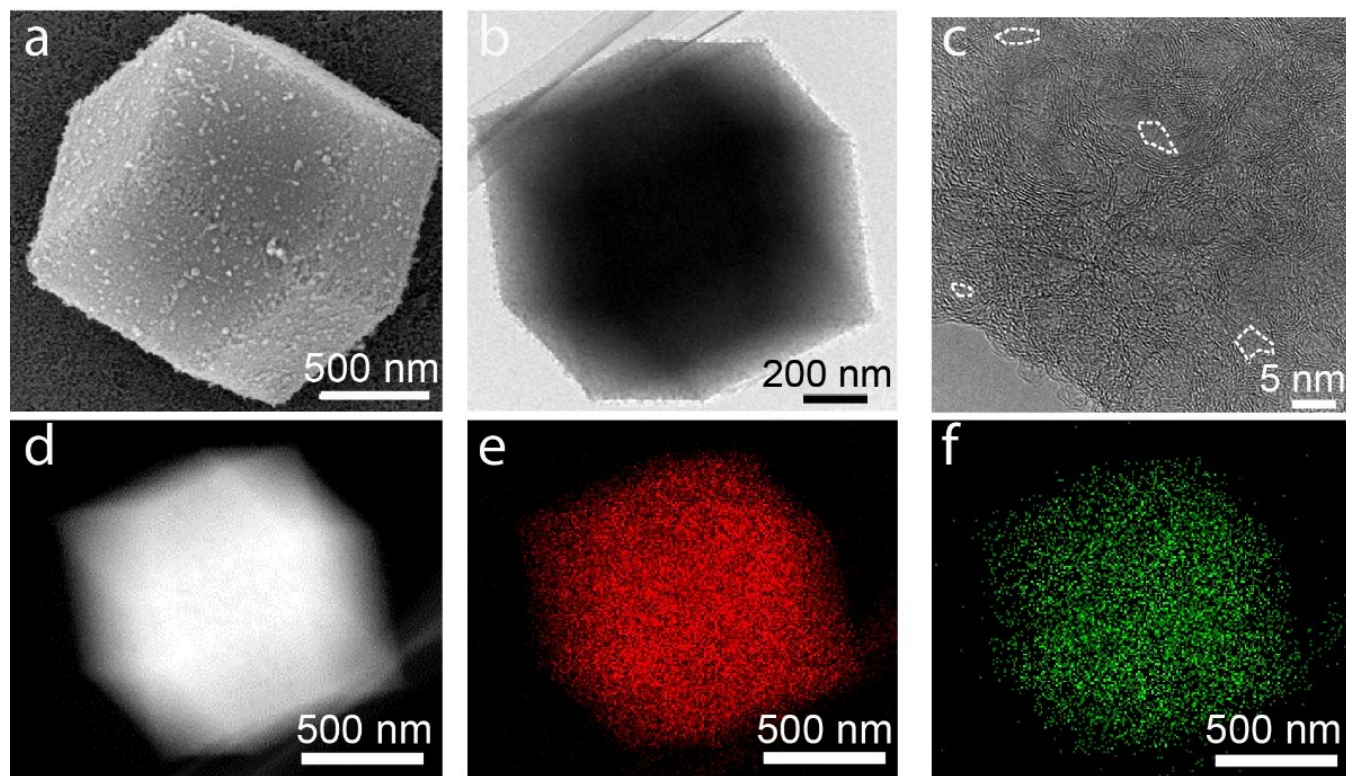

**Figure S2** (a) SEM image, (b) TEM image, (c) high-resolution TEM image (pores highlighted by dotted lines), and (d–f) HAADF-STEM image and elemental mapping of (e) carbon and (f) nitrogen.

Figure S3

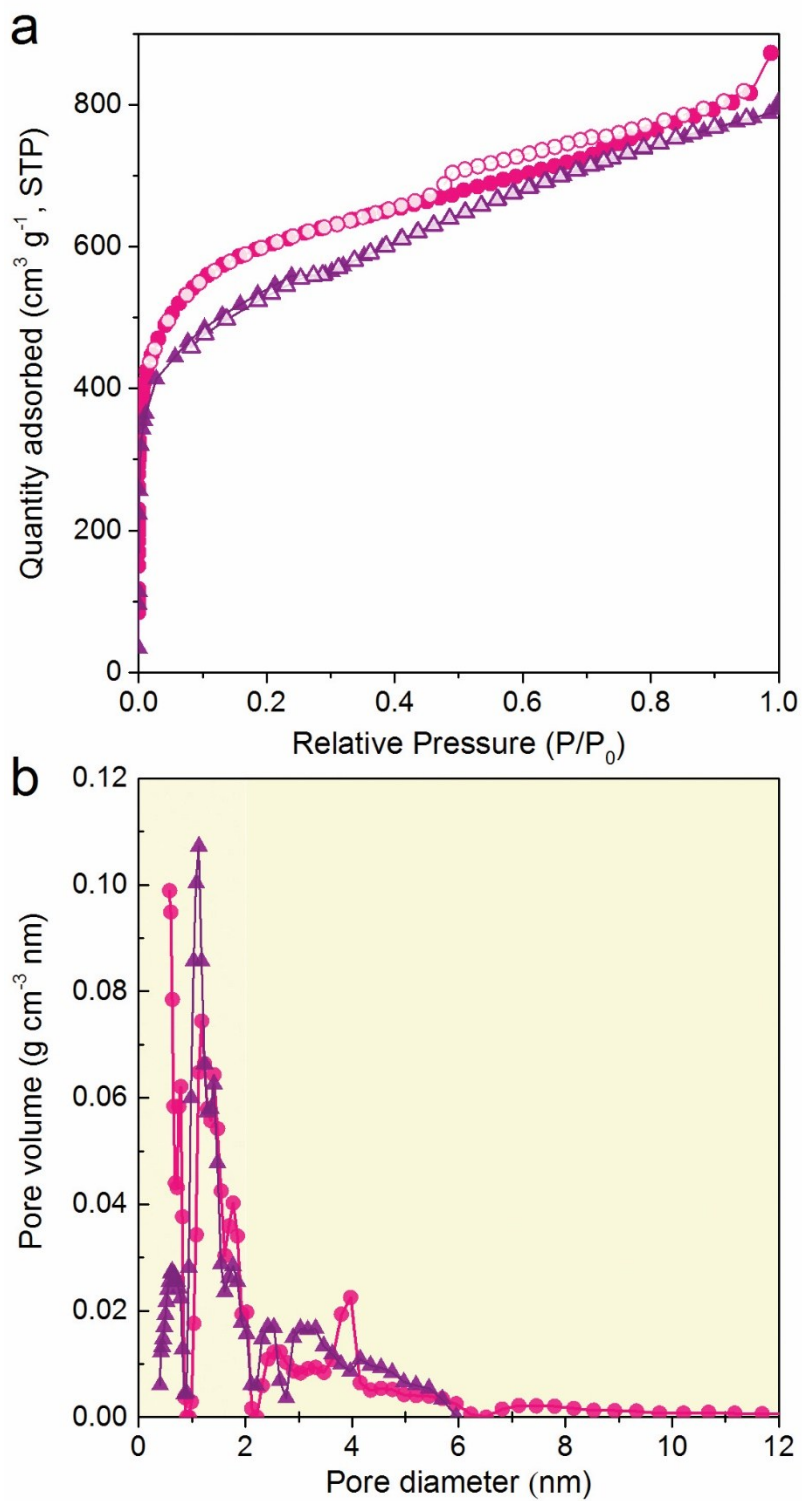

**Figure S3** (a) Nitrogen adsorption-desorption isotherms and (b) NLDFT pore-size distribution of MOF-derived NPC sample (shown by pink color) and AC sample (shown by purple color).

**Figure S4**

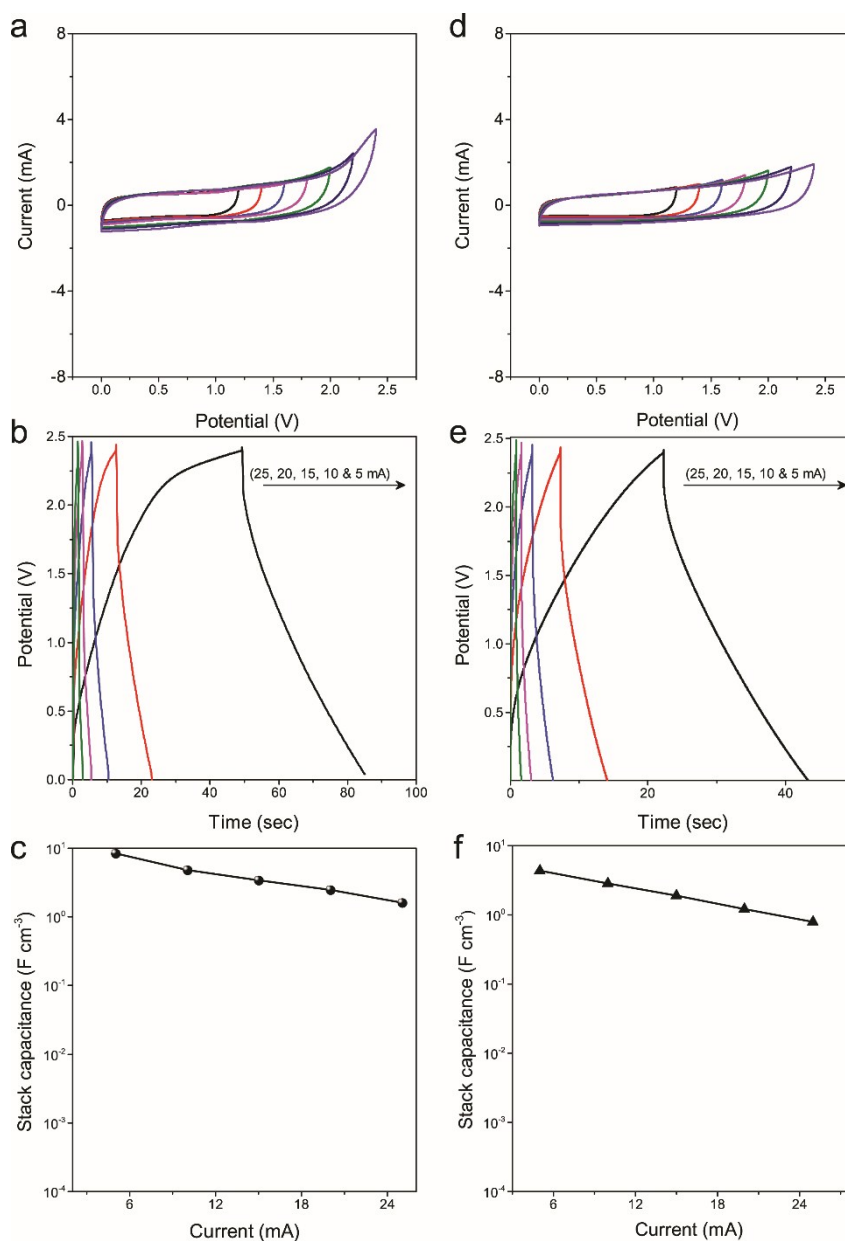

**Figure S4** (a) CV curves of NPC-based supercapacitor cell with upper cell voltage varied from 1.2 to 2.4 V, (b) galvanostatic charge-discharge studies in the potential window of 0.0 to 2.4 V at various applied currents, and (c) variation of stack capacitance at the applied currents. (d) CV curves of AC-based supercapacitor cell with upper cell voltage varied from 1.2 to 2.4 V, (e) galvanostatic charge-discharge studies in the potential window of 0.0 to 2.4 V at various applied currents, and (f) variation of stack capacitance at the applied currents for the AC sample.

**Figure S5**

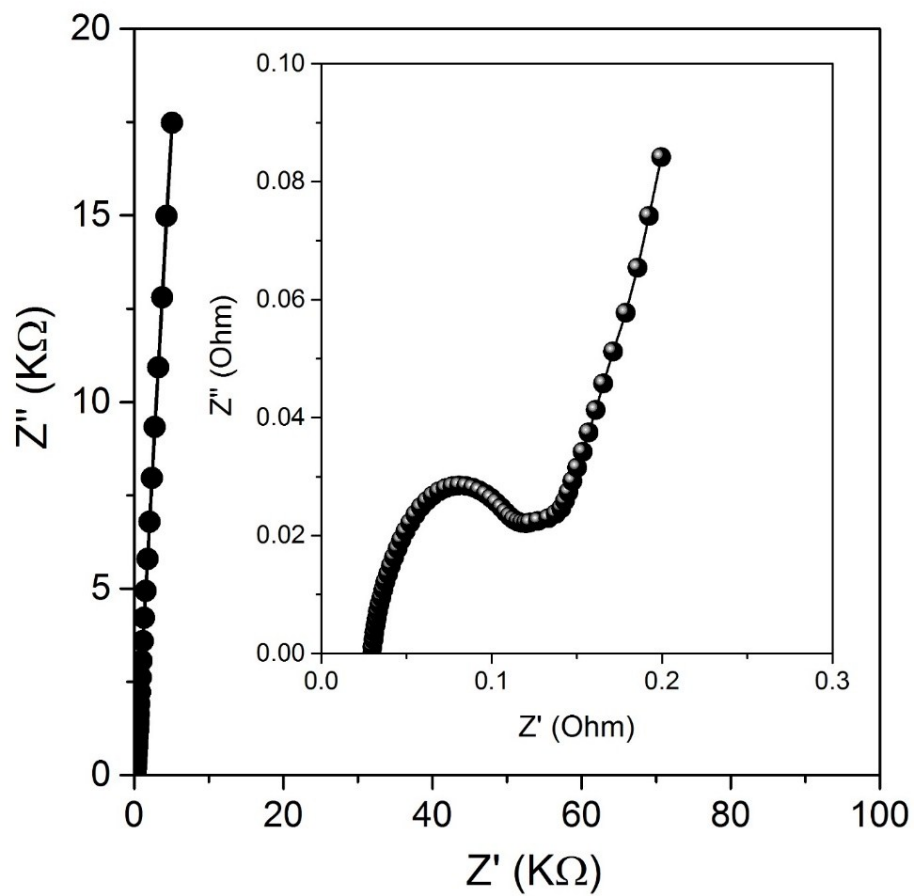

**Figure S5** Electrochemical impedance spectra (EIS) measured at a potential equal to open circuit potential.
